# Supplementary material
Source: PubMed Central journal article supplement (PMC3911264)

## Supplemental Data for:

The YmdB phosphodiesterase is a global regulator  
of late adaptive responses in *Bacillus subtilis*

**Christine Diethmaier<sup>1†</sup>, Joseph A. Newman<sup>2+\*</sup>, Ákos T. Kovács<sup>3,‡</sup>, Volkhard Kaefer<sup>4</sup>,  
Christina Herzberg<sup>2</sup>, Cecilia Rodrigues<sup>1</sup>, Mirjam Boonstra<sup>3</sup>, Oscar P. Kuipers<sup>3</sup>, Richard J.  
Lewis<sup>2#</sup>, and Jörg Stülke<sup>1#</sup>**

<sup>1</sup> Department of General Microbiology, Georg-August-University Göttingen, Grisebachstr. 8, 37077 Göttingen, Germany.

<sup>2</sup> Institute for Cell and Molecular Biosciences, Newcastle University, Newcastle upon Tyne, NE2 4HH, UK.

<sup>3</sup> Department of Molecular Genetics, University of Groningen, Groningen Biomolecular Sciences and Biotechnology Institute, Nijenborgh 7, 9747 AG Groningen, The Netherlands.

<sup>4</sup> Research Core Unit for Mass Spectrometry-Metabolomics and Institute of Pharmacology, Hannover Medical School, 30625 Hannover, Germany.

# For correspondence: Jörg Stülke, Email: [jstuelk@gwdg.de](mailto:jstuelk@gwdg.de) and Richard J. Lewis, Email: [r.lewis@ncl.ac.uk](mailto:r.lewis@ncl.ac.uk)

† These authors contributed equally to this work

\* Present address: Structural Genomics Consortium, Nuffield Department of Clinical Medicine, University of Oxford, Oxford, OX3 7DQ

‡ Present address: Terrestrial Biofilms Group, Institute of Microbiology, Friedrich Schiller University of Jena, 07745 Jena, Germany

## SUPPLEMENTAL TABLES

**TABLE S1:** Primers used in this study, all listed 5' to 3'.

| Primer                                                                                | Sequence                                                   | Restriction sites |
|---------------------------------------------------------------------------------------|------------------------------------------------------------|-------------------|
|                                                                                       | restriction sites are underlined                           |                   |
| <b><i>ymdB</i><sup>E39Q</sup> variant</b>                                             |                                                            |                   |
| <b><i>ymdB</i>-cat &amp; <i>ymdB</i><sup>E39Q</sup>-cat (chromosomal)</b>             |                                                            |                   |
| CD95                                                                                  | AAA <u>AAGCTTT</u> TGATAGGACGGCAAGGAATTTTCAAGAAG           | <i>Hind</i> III   |
| CD128                                                                                 | GCCTCACTTTACCATTATTAATGGTCAAAACGCCGCACATGG                 |                   |
| ML196                                                                                 | CCTATCACCTCAAATGGTTCGCTGTTCTGCTCCCCCTTAGTTT<br>TACAATG     |                   |
| ML197                                                                                 | CGAGCGCCTACGAGGAATTTGTATCGAACGGCATATATTACT<br>GATGTGGGAATG |                   |
| ML198                                                                                 | ACAGTCGACCTCCGATTATAGCAGTATTGGTACACA                       |                   |
| <b><i>ymdB</i>-Strep-cat &amp; <i>ymdB</i><sup>E39Q</sup>-Strep-cat (chromosomal)</b> |                                                            |                   |
| CD62                                                                                  | AAAG <u>GATCC</u> CAAGAAGAAAGGATTACAAAATGAG                | <i>Bam</i> HI     |
| ML94                                                                                  | CCTATCACCTCAAATGGTTCGCTGAGCTATTATCATTTTTTCG<br>AACTGCGG    |                   |
| ML197                                                                                 | CGAGCGCCTACGAGGAATTTGTATCGAACGGCATATATTACT<br>GATGTGGGAATG |                   |
| ML198                                                                                 | ACAGTCGACCTCCGATTATAGCAGTATTGGTACACA                       |                   |
| <b><i>ymdB</i> &amp; <i>ymdB</i><sup>E39Q</sup> in pGP172</b>                         |                                                            |                   |
| CD174                                                                                 | AAAG <u>GAGCTC</u> GATGAGAATTTTATTTATCGGAGATGTTGTC         | <i>Sac</i> I      |
| CD93                                                                                  | AAAG <u>GATCC</u> TCACTATTCAAAGAACATGTGATCATCG             | <i>Bam</i> HI     |
| <b>Northern Blot</b>                                                                  |                                                            |                   |
| <b><i>sspB</i> probe</b>                                                              |                                                            |                   |
| CD242                                                                                 | GCTAACCAAAACTCTTCAAATGACTTAC                               |                   |
| CD243+T7                                                                              | CTAATACGACTCACTATAGGGAGATGAACTCTGCCGCCCATTTG<br>C          |                   |
| <b><i>sigG</i> probe</b>                                                              |                                                            |                   |
| CD244                                                                                 | GTCGAAATCTGCGGGGTGGAT                                      |                   |
| CD245+T7                                                                              | CTAATACGACTCACTATAGGGAGAGTTTGATAGCCGCTTTTTCA<br>AGTCTG     |                   |

---

**qRT-PCR**

---

|       |                           |                 |
|-------|---------------------------|-----------------|
| CD248 | GGCTAACCAAAACTCTTCAAATGAC | <i>sspB</i> fwd |
| CD249 | GTGATTTCTCCTCCGACAGAAC    | <i>sspB</i> rev |
| CD250 | GGCAGCTGCAGGATGAAGG       | <i>sigG</i> fwd |
| CD251 | ATTCATTAGTCCGATGCAGCCG    | <i>sigG</i> rev |

---

**Recombinant protein production in *E. coli***

---

|         |                                               |              |
|---------|-----------------------------------------------|--------------|
| NcoFor  | <u>CCATGGGC</u> CAGAATTTTATTTATCGGAGATGTTGTCG | <i>NcoI</i>  |
| BamRev2 | GGAT <u>CCAATT</u> CAAAGAACATGTGATCATCG       | <i>BamHI</i> |

**TABLE S2:** Plasmids used in this study.

| Plasmid                                        | Relevant characteristics                                                                                                                    | Primers | Reference                                    |
|------------------------------------------------|---------------------------------------------------------------------------------------------------------------------------------------------|---------|----------------------------------------------|
| <b>Construction of YmdB/YmdBE39Q-Strep-tag</b> |                                                                                                                                             |         |                                              |
| pGP172                                         | vector for the expression of proteins in <i>E. coli</i> , the plasmid allows to fuse a Strep-tag to the N-terminus of the expressed protein |         | Merzbacher <i>et al.</i> , 2004 <sup>2</sup> |
| pGP1919                                        | pGP382- <i>ymdB</i>                                                                                                                         |         | This study                                   |
| pGP1920                                        | pGP382- <i>ymdB</i> <sup>E39Q</sup>                                                                                                         |         | This study                                   |

**Table S3. Effects of the *ymdB* deletion on gene expression in the exponential phase of growth.**  
Genes with Bayes' *P* value below  $10^{-5}$  were considered to be significantly affected.

| <b>Transcription unit</b>                              | <b>Function</b>                            | <b>Known regulation</b> | <b>Gene expression ratio</b> |
|--------------------------------------------------------|--------------------------------------------|-------------------------|------------------------------|
| mRNAs with increased amounts upon <i>ymdB</i> deletion |                                            |                         |                              |
| <i>yjfB</i>                                            | unknown                                    | SigD                    | 15.2                         |
| <i>motAB</i>                                           | motility and chemotaxis                    | SigD                    | 12.7                         |
| <i>comFA-FB-FC-yvyF-flgM-yvyG-flgK-flgL</i>            | genetic competence                         | SigD, ComK, DegU        | 12.5                         |
| <i>hag</i>                                             | flagellin                                  | SigD                    | 12                           |
| <i>yfmTS</i>                                           | unknown                                    | SigD                    | 11.5                         |
| <i>fla-che</i>                                         | movement and chemotaxis                    | SigD                    | 10.5                         |
| <i>narGHJI</i>                                         | nitrate respiration, nitrogen assimilation | Fnr; SigA               | 5.7                          |
| <i>yolAB</i>                                           | unknown (SP $\beta$ prophage)              | AbrB                    | 5.5                          |
| <i>yorRQP</i>                                          | unknown (SP $\beta$ prophage)              |                         | 5.2                          |
| <i>mtlAFD</i>                                          | mannitol uptake and phosphorylation        | MtlR (PRD-type)         | 5                            |
| <i>yjfA</i>                                            | sporulation                                | SigE                    | 4.8                          |
| <i>manP-manA-yjdF</i>                                  | mannose uptake and phosphorylation         | ManR (PRD-type)         | 4.1                          |
| <i>cgeCDE</i>                                          | sporulation                                | SigK, GerE              | 4.7                          |
| <i>levDEFG-sacC</i>                                    | fructose uptake and phosphorylation        | LevR (PRD-type)         | 3.8                          |
| <i>csrA</i>                                            | control of <i>hag</i> translation          | SigD, SigA              | 3.7                          |
| <i>comGA-GB-GC-GD-GE-GF-GG-yqzE</i>                    | genetic competence                         | ComK                    | 3.6                          |
| <i>yhcN</i>                                            | unknown, forespore-specific                | SigF, SigG              | 3.6                          |
| <i>narK</i>                                            | nitrate respiration; nitrite export        | Fnr, NsnR               | 3.4                          |
| <i>pyrR-P-B-C-AA-AB-K-D-F-E</i>                        | regulation of pyrimidine biosynthesis      | PyrR                    | 3.0                          |

---

mRNAs with decreased amounts upon *ymdB* deletion

---

|                                                              |                                              |                        |      |
|--------------------------------------------------------------|----------------------------------------------|------------------------|------|
| <b><i>tapA-sipW-tasA</i></b>                                 | biofilm formation                            | SinR, AbrB             | 0.03 |
| <b><i>epsA-O</i></b>                                         | biofilm formation                            | SinR, AbrB             | 0.07 |
| <b><i>skfA-skfB-skfC-skfE-skfF-skfG-skfH</i></b>             | spore killing factor                         | AbrB, Spo0A            | 0.1  |
| <b><i>yvdFGHIJ</i></b>                                       | control of LiaR-LiaS activity                | AbrB                   | 0.13 |
| <b><i>argC-argJ-argB-argD-carA-carB-argF</i></b>             | biosynthesis of arginine                     | AhrC                   | 0.14 |
| <b><i>bslA</i></b>                                           | Biofilm-surface layer protein                | AbrB, DegU, Rok        | 0.15 |
| <b><i>sdpABC</i></b>                                         | spore killing factor                         | AbrB, Rok, Spo0A       | 0.18 |
| <b><i>cotG</i></b>                                           | spore coat protein                           | GerE, GerR, SigK       | 0.18 |
| <b><i>yurI-P</i></b>                                         | extracellular RNA degradation                | CodY, FlrR             | 0.21 |
| <b><i>sdpR-sdpI</i></b>                                      | regulation of protection against SdpC        | AbrB, SdpR             | 0.23 |
| <b><i>opuCA-CB-CC-CD</i></b><br><b><i>opuBA-BB-BC-BD</i></b> | ABC transporter; compatible solute transport | induced by salt stress | 0.25 |
| <b><i>cotVWX</i></b>                                         | spore coat protein                           | GerE, SigK             | 0.25 |
| <b><i>ycdA</i></b>                                           | swarming motility                            | Abh, AbrB              | 0.3  |
| <b><i>yqxIJ</i></b>                                          | unknown                                      | AbrB, CcpA, Spo0A      | 0.3  |
| <b><i>yisI</i></b>                                           | Spo0A phosphatase                            |                        | 0.32 |
| <b><i>argGH</i></b>                                          | biosynthesis of arginine                     |                        | 0.33 |
| <b><i>tkmA-ptkA-ptpZ-ugd</i></b>                             | control of protein tyrosine phosphorylation  | AbrB                   | 0.33 |

Tables S3 and S4 list genes with a gene expression ratio of  $\geq 3$  or  $\leq 0.33$ . Regulated genes within an operon are shown in boldface. Functional information and known regulation is based on the SubtiWiki database<sup>4</sup>. For the whole list of *ymdB*-regulated genes see GEO submission, with accession number GSE39142.

**Table S4. Effects of the *ymdB* deletion on gene expression in the stationary phase of growth.**  
Genes with Bayes' *P* value below  $10^{-5}$  were considered to be significantly affected.

| Transcription unit                                                | Function                                                                   | Known regulation | Gene expression ratio |
|-------------------------------------------------------------------|----------------------------------------------------------------------------|------------------|-----------------------|
| mRNAs with increased amounts upon <i>ymdB</i> deletion            |                                                                            |                  |                       |
| <i>sspA, sspB, sspC, sspD, sspF, sspK, sspM, sspN, sspO, sspP</i> | small acid-soluble spore protein (SASP)                                    | SigG, SpoVT      | 47.5                  |
| <i>yxeEFG</i>                                                     | spore coat protein                                                         | GerE, SigK       | 33                    |
| <i>manP-manA-yjdF</i>                                             | mannose uptake and phosphorylation                                         | ManR (PRD type)  | 20                    |
| <i>yvzB</i>                                                       | similar to flagellin                                                       |                  | 17                    |
| <i>rbsR-rbsK-rbsD-rbsA-rbsC-rbsB</i>                              | ribose uptake                                                              | AbrB, CcpA       | 16.5                  |
| <i>iolA-iolB-iolC-iolD-iolE-iolF-iolG-iolH-iolI-iolJ</i>          | myo-inositol catabolism                                                    | CcpA, IolR       | 15.1                  |
| <i>hag</i>                                                        | flagellin                                                                  | SigD             | 15                    |
| <i>yjfB</i>                                                       | unknown                                                                    | SigD             | 13                    |
| <i>yhcN</i>                                                       | unknown; forespore specific                                                | SigF, SigG       | 11.6                  |
| <i>mtlAFD</i>                                                     | mannitol uptake and phosphorylation                                        | MtlR (PRD type)  | 10.1                  |
| <i>licB-licC-licA-licH</i>                                        | lichenan uptake and phosphorylation                                        | CcpA, LicR       | 9.8                   |
| <i>yteA</i>                                                       | unknown; sporulation protein                                               | SigG             | 9.6                   |
| <i>acoR-sspH</i>                                                  | small acid-soluble spore protein (SASP); regulation of acetoin utilization | CcpA, SigG       | 9                     |
| <i>yhcV</i>                                                       | unknown; forespore specific                                                | SigG             | 8.6                   |
| <i>spoVAA-spoVAB-spoVAC-spoVAD-spoVAE-spoVAF-lysA</i>             | spore maturation                                                           | SigG, SpoVT      | 7.8                   |
| <i>gdh</i>                                                        | glucose-1-dehydrogenase; germination                                       | SigG, SpoVT      | 7.5                   |
| <i>yuzA</i>                                                       | unknown; general stress protein                                            | SigG, SigB       | 7                     |
| <i>yvmC-cypX</i>                                                  | biosynthesis of the extracellular iron chelator pulcherrimin               | AbrB             | 6.7                   |
| <i>fla-che</i>                                                    | movement and chemotaxis                                                    | SigD             | 6.6                   |
| <i>treP-treA-treR</i>                                             | trehalose uptake and                                                       | CcpA, TreR       | 6.3                   |

|                          |                                                                         |                     |     |
|--------------------------|-------------------------------------------------------------------------|---------------------|-----|
|                          | phosphorylation                                                         |                     |     |
| <i>yhcM</i>              | unknown; general stress protein                                         | SigG, SigB,<br>SigF | 6.2 |
| <i>xynP-xynB</i>         | xylan utilization                                                       | CcpA, XylR          | 5.6 |
| <i>gerBA-gerBB-gerBC</i> | germination                                                             | SigG                | 4.7 |
| <i>glpT</i>              | glycerol-3-phosphate-permease                                           | CcpA, GlpP          | 4.6 |
| <i>xylA</i>              | utilization of xylan and xylose                                         | CcpA, XylR          | 4.4 |
| <i>manR</i>              | transcriptional regulator (PRD-type) regulation of mannose utilization  |                     | 4   |
| <i>levDEFG-sacC</i>      | fructose uptake and phosphorylation                                     | LevR (PRD type)     | 3.4 |
| <i>mtlR</i>              | transcriptional regulator (PRD-type) regulation of mannitol utilization |                     | 3.3 |
| <i>csgA-ybxH</i>         | spore maturation                                                        | SigG, SpoVT         | 3   |

---

mRNAs with decreased amounts upon *ymdB* deletion

---

|                                           |                                                                                 |                     |      |
|-------------------------------------------|---------------------------------------------------------------------------------|---------------------|------|
| <i>tapA-sipW-tasA</i>                     | biofilm formation                                                               | SinR, AbrB          | 0.03 |
| <i>usd-spoIIID-mbl-flhO-flhP</i>          | required for translation of SpoIIID ; regulation of mother cell gene expression | SigE                | 0.07 |
| <i>skfA-skfB-skfC-skfE-skfF-skfG-skfH</i> | spore killing factor                                                            | AbrB, Spo0A         | 0.08 |
| <i>epsA-O</i>                             | biofilm formation                                                               | SinR, AbrB          | 0.15 |
| <i>argGH</i>                              | biosynthesis of arginine                                                        | AhrC                | 0.15 |
| <i>hom-thrC-thrB</i>                      | biosynthesis of threonine                                                       |                     | 0.16 |
| <i>argC-argJ-argB-argD-carA-carB-argF</i> | biosynthesis of arginine                                                        | AhrC                | 0.16 |
| <i>kapB</i>                               | control of sporulation initiation                                               | CodY                | 0.17 |
| <i>bslA</i>                               | biofilm surface layer protein                                                   | AbrB, DegU,<br>Rok  | 0.19 |
| <i>sdpA-sdpB-sdpC</i>                     | spore killing factor                                                            | AbrB, Rok,<br>Spo0A | 0.2  |
| <i>cggR-gapA-pgk-tpiA-pgm-eno</i>         | glycolysis                                                                      | CggR, SigA          | 0.2  |
| <i>sdpA</i>                               | unknown; cannibalism                                                            | AbrB, Rok,          | 0.21 |



|                                                                    |                                                      | Spo0A                  |      |
|--------------------------------------------------------------------|------------------------------------------------------|------------------------|------|
| <b><i>rapE</i></b>                                                 | control of sporulation initiation                    | CodY, ComA             | 0.22 |
| <i>yokI-yokJ-yokK-yokL</i>                                         | unknown; toxicity                                    | AbrB                   | 0.23 |
| <b><i>sunT-bdbA-yoIJ-bdbB</i></b>                                  | sublancin export and processing                      | Abh, AbrB, Rok         | 0.24 |
| <i>spoIIIAA-AB-AC-AD-AE-AF-AG-AH</i>                               | protein secretion, sporulation                       | SigE, SpoIIID          | 0.25 |
| <b><i>spoIIIE</i></b>                                              | control of SigF activity; protein-serine-phosphatase | Spo0A                  | 0.25 |
| <i>opuCA-CB-CC-CD</i>                                              | ABC transporter; compatible solute transport         | induced by salt stress | 0.25 |
| <b><i>dppA-dppB-dppC-dppD-dppE</i></b>                             | degradation of cell wall peptides                    | CodY                   | 0.25 |
| <i>cotJA-JB-JC</i>                                                 | polypeptide composition of the spore coat            | SigE, SpoIIID          | 0.25 |
| <i>purE-purK-purB-purC-purS-purQ-purL-purF-purM-purN-purH-purD</i> | purine biosynthesis                                  | PurR                   | 0.27 |
| <b><i>yqxIJ</i></b>                                                | unknown                                              | AbrB, CcpA, Spo0A      | 0.27 |
| <b><i>rapK-phrK</i></b>                                            | response regulator; control of ComA activity         | AbrB, SigH             | 0.27 |
| <b><i>frr</i></b>                                                  | ribosome-recycling factor; translation               | RelA                   | 0.29 |
| <b><i>groES-groEL</i></b>                                          | protein folding and re-folding                       | HrcA                   | 0.31 |
| <i>spoIIIGA-sigE-sigG</i>                                          | maturation of SigE                                   | SinR, Spo0A            | 0.32 |

Tables S3 and S4 list genes with a gene expression ratio of  $\geq 3$  or  $\leq 0.33$ . Regulated genes within an operon are shown in boldface. Functional information and known regulation is based on the SubtiWiki database<sup>3</sup>. For the whole list of *ymdB*-regulated genes see GEO submission, with accession number GSE39142.

## SUPPLEMENTARY FIGURES

**Figure S1.** X-ray absorption scans of YmdB around the Fe *K* atomic absorption edge. The X-ray absorption spectrum of YmdB crystals was performed on the Diamond synchrotron Light Source beamline I02, and analyzed using the program CHOOCH<sup>4</sup>. The only element with any atomic absorption edge in this spectral range, between 7082 and 7136 eV, is Fe, the crystals thus contain Fe.

**Figure S2.** Metal dependency of the YmdB phosphodiesterase activity. The phosphodiesterase activity in the presence of 0.5 mM 2',3' cAMP and 0.2 mM metal ions is shown. The reaction mixture contained 2.5 µg of YmdB. Though the highest enzymatic activities were actually observed in the presence of cobalt, this is likely to be artificial since the role of cobalt in biology is restricted to the biosynthesis of vitamin B12, a process that does not occur in *B. subtilis*.

## SUPPLEMENTARY REFERENCES

1. Diethmaier, C., Pietack, N., Gunka, K., Wrede, C., Lehnik-Habrink, M., Herzberg, C., Hubner, S. & Stülke, J. (2011). A novel factor controlling bistability in *Bacillus subtilis*: the YmdB protein affects flagellin expression and biofilm formation. *J Bacteriol* **193**, 5997-6007.
2. Merzbacher, M., Detsch, C., Hillen, W. & Stülke, J. (2004). *Mycoplasma pneumoniae* HPr kinase/phosphorylase. *Eur J Biochem* **271**, 367-74.
3. Lammers, C. R., Flórez, L. A., Schmeisky, A. G., Roppel, S. F., Mäder, U., Hamoen, L. & Stülke, J. (2010). Connecting parts with processes: SubtiWiki and SubtiPathways integrate gene and pathway annotation for *Bacillus subtilis*. *Microbiology* **156**, 849-59.
4. Evans, G. (2005) CHOOCH-automatic analysis of fluorescence scans and determination of optimal X-ray wavelengths for MAD and SAD. *CCP4 Newsletter on Protein Crystallography*. **42**, 33-7.

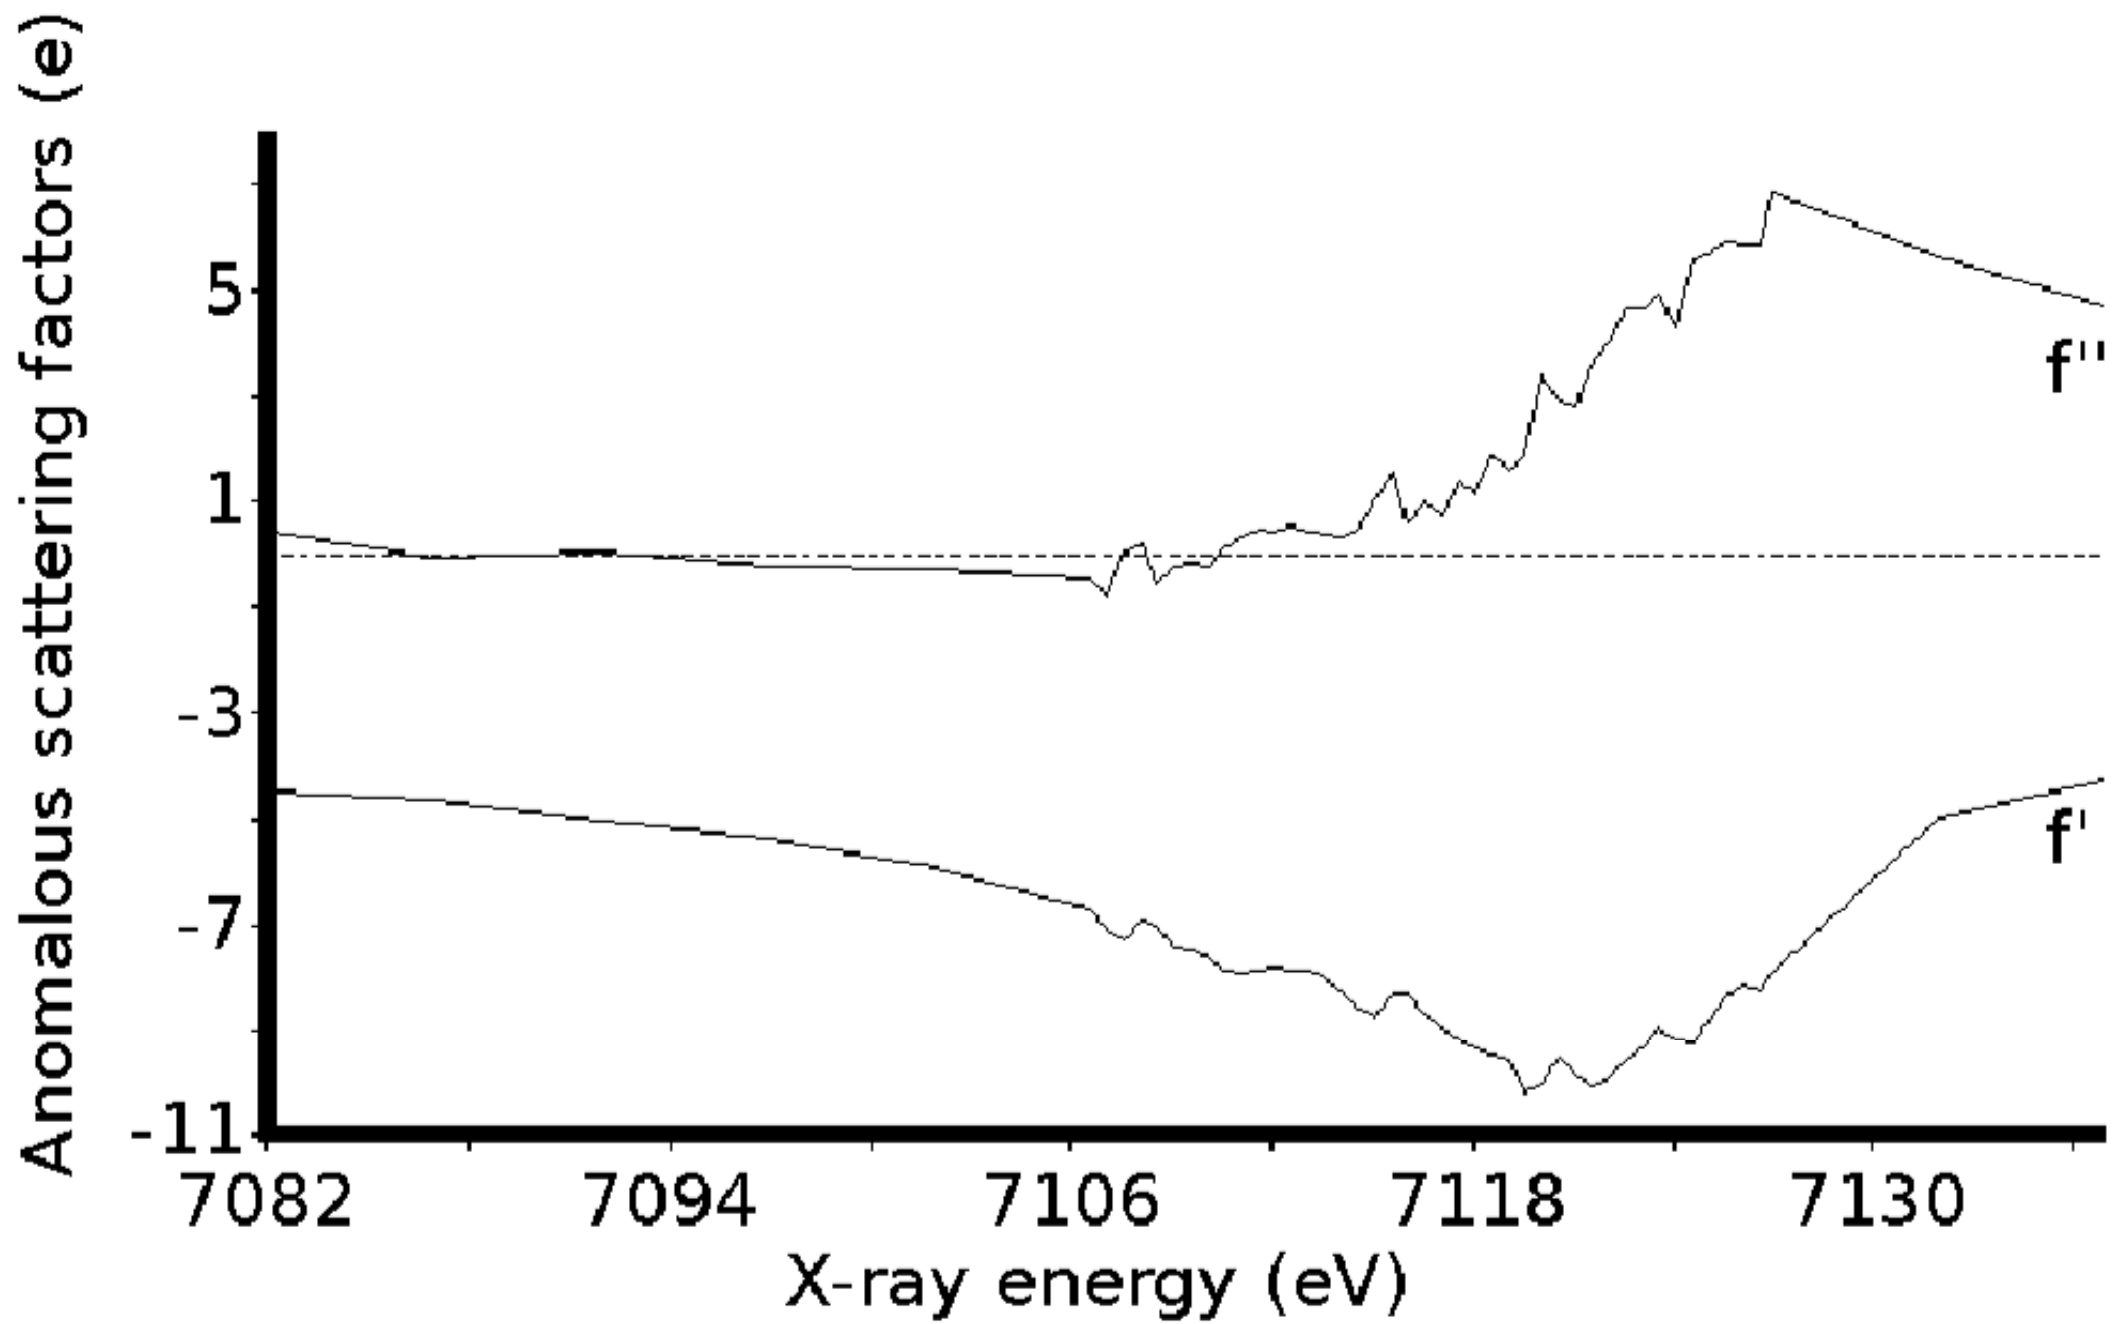

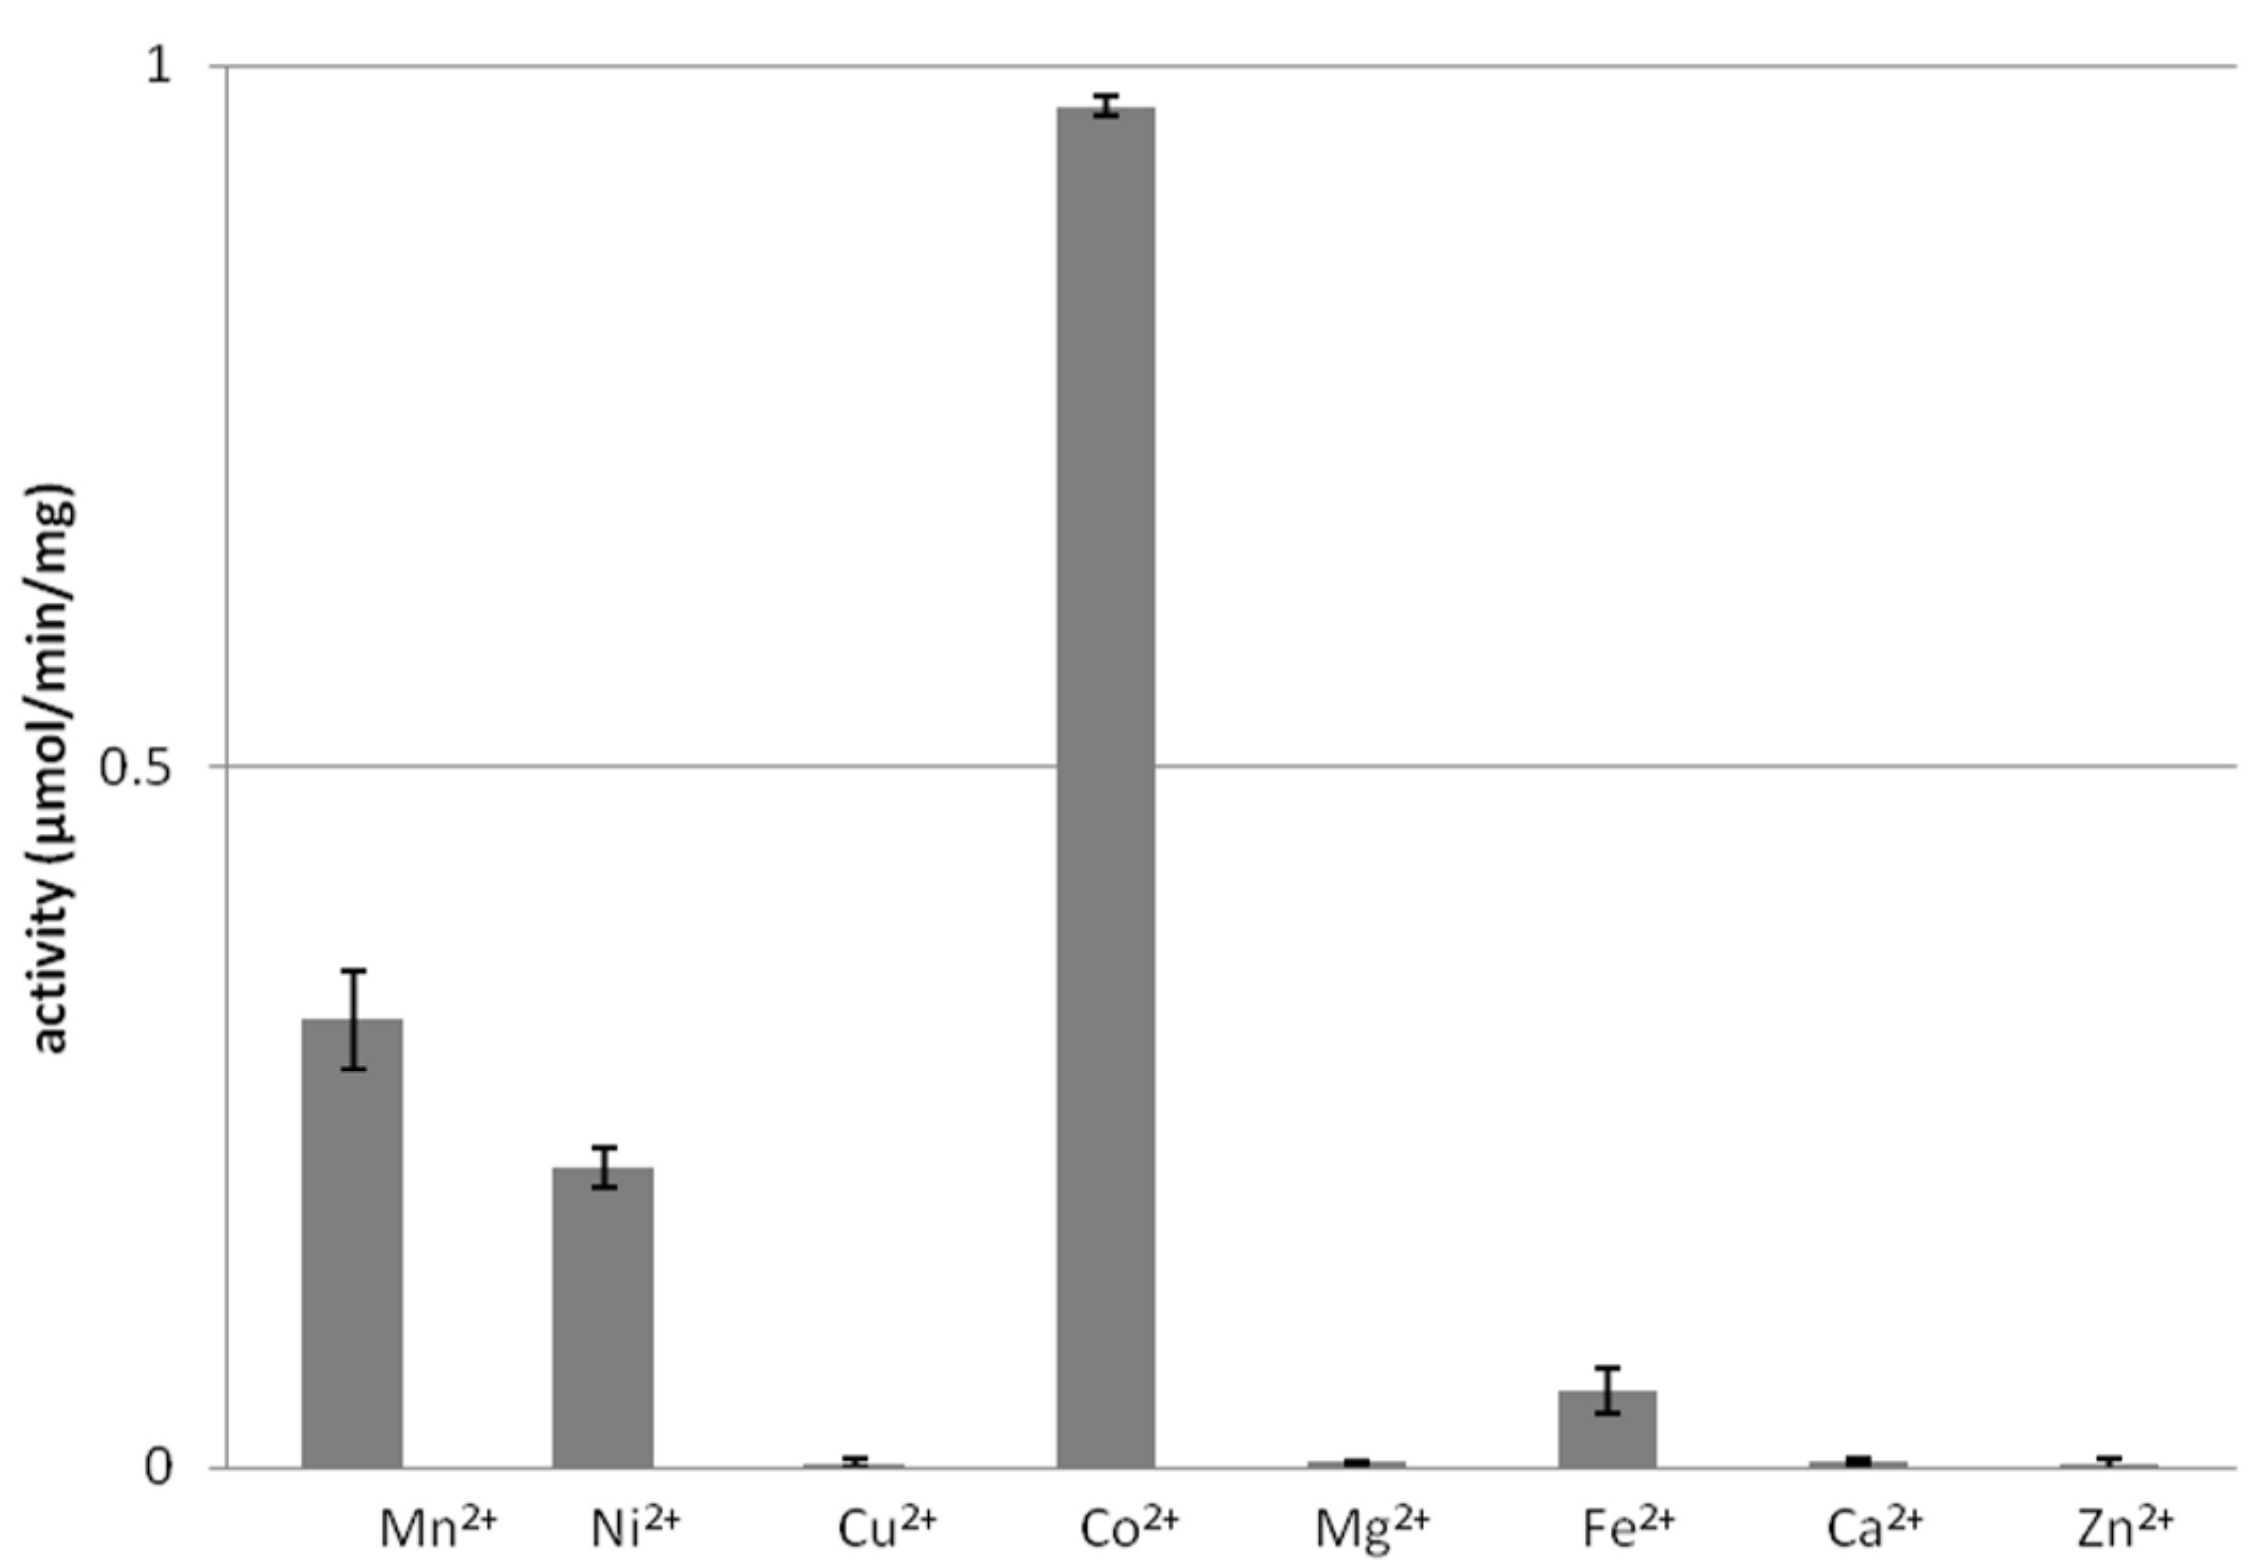

Supplement: JB.00826-13_zjb999092972so1.pdf [file JB.00826-13_zjb999092972so1.pdf]
